# Supplementary material for: Ab initio non-covalent crystal field theory for lanthanide complexes: a multiconfigurational non-orthogonal group function approach
Source: Royal Society of Chemistry journal article supplement (doi:10.1039/d1cp05488k), 2022-01-01
Supplement: d1cp05488k1.pdf [file d1cp05488k1.pdf]

**Supporting Information:**

**Ab Initio Non-Covalent Crystal Field Theory for  
Lanthanide Complexes: A Multiconfigurational  
Non-Orthogonal Group Functions Approach**

Alessandro Soncini\* and Matteo Piccardo

E-mail: [asoncini@unimelb.edu.au](mailto:asoncini@unimelb.edu.au)

# Contents

|                                 |     |
|---------------------------------|-----|
| List of Tables                  | S-2 |
| Spin partitioning               | S-3 |
| Cholesky representation         | S-3 |
| Magnetic moment and $g$ -tensor | S-5 |
| Statistics                      | S-7 |

## List of Tables

|    |                    |     |
|----|--------------------|-----|
| S1 | Tb(III) statistics | S-7 |
| S2 | Dy(III) statistics | S-7 |
| S3 | Ho(III) statistics | S-8 |
| S4 | Er(II) statistics  | S-8 |

## Spin partitioning

Some simplification can be done nothing that  $\mathbf{S}$  is block diagonal in the spin coordinates. Then,  $\mathbf{S}^{-1}$  is explicitly given by:

$$\mathbf{S}^{-1} = \begin{pmatrix} \mathbf{S}_{\alpha\alpha}^{-1} & \mathbf{0} \\ \mathbf{0} & \mathbf{S}_{\beta\beta}^{-1} \end{pmatrix} \quad (\text{S1})$$

and the term in the right-hand side of eq. (49) in the main text reads:

$$\langle \phi_i | h | \phi_j \rangle \text{cof}[\mathbf{S}](ij) = \delta_{\eta_i \eta_j} \langle \chi_i | h | \chi_j \rangle \text{cof}[\mathbf{S}](ij) \quad (\text{S2})$$

where  $\chi_i/\eta_i$  is the spatial/spin part of  $\phi_i$ , and:

$$\text{cof}[\mathbf{S}](ij) = \begin{cases} \text{cof}[\mathbf{S}_{\alpha\alpha}](ij) \det(\mathbf{S}_{\beta\beta}) & \text{if } \eta_i = \eta_j = \alpha \\ \text{cof}[\mathbf{S}_{\beta\beta}](ij) \det(\mathbf{S}_{\alpha\alpha}) & \text{if } \eta_i = \eta_j = \beta \end{cases} \quad (\text{S3})$$

The matrix partitioning presented in eq. (53) is now applied to  $\mathbf{S}_{\alpha\alpha}$  and  $\mathbf{S}_{\beta\beta}$  blocks. In a similar way, the term in the right-hand side of eq. (50) reads:

$$\langle \phi_i \phi_k | g | \phi_j \phi_l \rangle \text{cof}[\mathbf{S}](ij|kl) = \delta_{\eta_i \eta_j} \delta_{\eta_k \eta_l} \langle \chi_i \chi_k | g | \chi_j \chi_l \rangle \text{cof}[\mathbf{S}](ij|kl) \quad (\text{S5})$$

with:

$$\text{cof}[\mathbf{S}](ij|kl) = \begin{cases} \text{cof}[\mathbf{S}_{\alpha\alpha}](ij|kl) \det(\mathbf{S}_{\beta\beta}) & \text{if } \eta_i = \eta_j = \eta_k = \eta_l = \alpha \\ \text{cof}[\mathbf{S}_{\beta\beta}](ij|kl) \det(\mathbf{S}_{\alpha\alpha}) & \text{if } \eta_i = \eta_j = \eta_k = \eta_l = \beta \\ \text{cof}[\mathbf{S}_{\alpha\alpha}](ij) \text{cof}[\mathbf{S}_{\beta\beta}](kl) & \text{if } \eta_i = \eta_j = \alpha, \text{ and } \eta_k = \eta_l = \beta \\ \text{cof}[\mathbf{S}_{\beta\beta}](ij) \text{cof}[\mathbf{S}_{\alpha\alpha}](kl) & \text{if } \eta_i = \eta_j = \beta, \text{ and } \eta_k = \eta_l = \alpha \end{cases} \quad (\text{S6})$$

Note that in the last two cases the second-order cofactor reduces to the product of two first-order cofactors.

## Cholesky representation

A strategy that allows for a significant speed up in the computations is the use of the Cholesky representation of the two-electron repulsion integrals (ERI). Within this representation, the ERIs are defined as:

$$\langle \chi_i \chi_k | g | \chi_j \chi_l \rangle = \sum_J L_{ij}^J L_{kl}^J \quad (\text{S10})$$

where  $L_{ij}^J$  is a component of the  $J$ -th Cholesky vector  $\mathbf{L}^J$ . Partitioning both  $\mathbf{S}_{\alpha\alpha}$  and  $\mathbf{S}_{\beta\beta}$  blocks as shown in eq.(53), and defining the three matrices:

$$\mathbf{T}^J = \mathbf{L}^J \mathbf{T} \quad \mathbf{W}^J = \mathbf{L}^J \mathbf{W} \quad \mathbf{K}^J = \mathbf{Y}' \mathbf{L}^J \mathbf{X}' \quad (\text{S11})$$

eq. (S5) can be written for the case  $\eta_i = \eta_j = \eta_k = \eta_l = \alpha$  as (similar development for the case  $\eta_i = \eta_j = \eta_k = \eta_l = \beta$ ):

$$\begin{aligned} & \sum_{\substack{i < k \\ i, k \in \alpha}} \sum_{\substack{j < l \\ j, l \in \alpha}} \left[ \langle \phi_i \phi_k | g | \phi_j \phi_l \rangle - \langle \phi_i \phi_k | g | \phi_l \phi_j \rangle \right] \text{cof}[\mathbf{S}](ij|kl) \\ &= \det(\mathbf{S}_{\beta\beta}) \det(\mathbf{A}) \sum_J \left\{ \det(\mathbf{Z}) \sum_{i < k} (T_{ii}^J T_{kk}^J - T_{ik}^J T_{ki}^J) \right. \\ & \quad + \sum_{i < k} (T_{ii}^J W_{kk}^J - T_{ik}^J W_{ki}^J + W_{ii}^J T_{kk}^J - W_{ik}^J T_{ki}^J) \\ & \quad \left. + \sum_{p < r} \sum_{q < s} \text{cof}[\mathbf{Z}](qp|sr) (K_{qp}^J K_{sr}^J - K_{qr}^J K_{sp}^J) \right\} \quad (\text{S12}) \end{aligned}$$

We made use of the following simplifications:

$$\begin{aligned} & \sum_{i < k} \sum_{j < l} (L_{ij}^J L_{kl}^J - L_{il}^J L_{kj}^J) (T_{ji} T_{lk} - T_{li} T_{jk}) \\ &= \frac{1}{2} \sum_{i < k} \sum_{j < l} (L_{ij}^J L_{kl}^J - L_{il}^J L_{kj}^J) (T_{ji} T_{lk} - T_{li} T_{jk}) \\ &= \frac{1}{2} \sum_{i < k} \sum_{j < l} (L_{ij}^J T_{ji} L_{kl}^J T_{lk} - L_{ij}^J T_{jk} L_{kl}^J T_{li} + L_{il}^J T_{li} L_{kj}^J T_{jk} - L_{il}^J T_{lk} L_{kj}^J T_{ji}) \\ &= \sum_{i < k} (T_{ii}^J T_{kk}^J - T_{ik}^J T_{ki}^J) \quad (\text{S13}) \end{aligned}$$

$$\begin{aligned} & \sum_{i < k} \sum_{j < l} (L_{ij}^J L_{kl}^J - L_{il}^J L_{kj}^J) (T_{ji} W_{lk} - T_{li} W_{jk} + W_{ji} T_{lk} - W_{li} T_{jk}) \\ &= \frac{1}{2} \sum_{i < k} \sum_{j < l} (L_{ij}^J L_{kl}^J - L_{il}^J L_{kj}^J) (T_{ji} W_{lk} - T_{li} W_{jk} + W_{ji} T_{lk} - W_{li} T_{jk}) \\ &= \frac{1}{2} \sum_{i < k} \sum_{j < l} (L_{ij}^J T_{ji} L_{kl}^J W_{lk} - L_{ij}^J W_{jk} L_{kl}^J T_{li} + L_{ij}^J W_{ji} L_{kl}^J T_{lk} - L_{ij}^J T_{jk} L_{kj}^J T_{jk} \\ & \quad - L_{il}^J W_{lk} L_{kj}^J T_{jk} + L_{il}^J T_{li} L_{kj}^J W_{jk} - L_{il}^J T_{lk} L_{kj}^J W_{ji} + L_{il}^J W_{li} L_{kj}^J T_{jk}) \\ &= \sum_{i < k} (T_{ii}^J W_{kk}^J - T_{ik}^J W_{ki}^J + W_{ii}^J T_{kk}^J - W_{ik}^J T_{ki}^J) \quad (\text{S14}) \end{aligned}$$

$$\begin{aligned}
& \frac{1}{2} \sum_{i \neq k} \sum_{j \neq l} L_{ij}^J L_{kl}^J \sum_{p < r} \sum_{q < s} \text{cof}[\mathbf{Z}](qp|sr) (X_{jp} X_{lr} - X_{jr} X_{lp}) (Y_{qi} Y_{sk} - Y_{si} Y_{qk}) \\
&= \frac{1}{2} \sum_{p < r} \sum_{q < s} \text{cof}[\mathbf{Z}](qp|sr) \sum_{ik} \sum_{jl} \left( Y_{qi} L_{ij}^J X_{jp} Y_{sk} L_{kl}^J X_{lr} - Y_{si} L_{ij}^J X_{jp} Y_{qk} L_{kl}^J X_{lr} \right. \\
&\quad \left. + Y_{si} L_{ij}^J X_{jr} Y_{qk} L_{kl}^J X_{lp} - Y_{qi} L_{ij}^J X_{jr} Y_{sk} L_{kl}^J X_{lp} \right) \\
&= \sum_{p < r} \sum_{q < s} \text{cof}[\mathbf{Z}](qp|sr) \left( K_{qp}^J K_{sr}^J - K_{qr}^J K_{sp}^J \right) \tag{S15}
\end{aligned}$$

For the case  $\eta_i = \eta_j = \alpha$  and  $\eta_k = \eta_l = \beta$  we have (similar development for the case  $\eta_i = \eta_j = \beta$ , and  $\eta_k = \eta_l = \alpha$ ):

$$\begin{aligned}
& \sum_{i < k} \sum_{j < l} \left[ \langle \phi_i \phi_k | g | \phi_j \phi_l \rangle - \langle \phi_i \phi_k | g | \phi_l \phi_j \rangle \right] \text{cof}[\mathbf{S}](ij|kl) \\
&= \sum_{ij \in \alpha} \sum_{kl \in \beta} \langle \chi_i \chi_k | g | \chi_j \chi_l \rangle \text{cof}[\mathbf{S}](ij) \text{cof}[\mathbf{S}](kl) \\
&= \sum_J \left[ \sum_{ij} L_{ij}^J \text{cof}[\mathbf{S}_{\alpha\alpha}](ij) \right] \left[ \sum_{kl} L_{kl}^J \text{cof}[\mathbf{S}_{\beta\beta}](kl) \right] \\
&= \sum_J \text{Tr}(\mathbf{T}_{\alpha\alpha}^J + \mathbf{W}_{\alpha\alpha}^J) \cdot \text{Tr}(\mathbf{T}_{\beta\beta}^J + \mathbf{W}_{\beta\beta}^J) \tag{S16}
\end{aligned}$$

where  $\text{Tr}(\mathbf{T})$  is the trace of the matrix  $\mathbf{T}$ .

## Magnetic moment and $g$ -tensor

The  $\gamma$  cartesian component of the magnetic moment operator  $\mu_\gamma$  is defined in terms of the  $\gamma$  components of the total orbital-angular momentum  $\mathcal{L}_\gamma = \sum_i^{N_{\text{TOT}}} l_\gamma(i)$  and the total spin-angular momentum  $\mathcal{S}_\gamma = \sum_i^{N_{\text{TOT}}} s_\gamma(i)$  as:

$$\mu_\gamma = -(\mathcal{L}_\gamma + g_e \mathcal{S}_\gamma) \tag{S17}$$

where is  $g_e$  the electron spin  $g$ -factor. The expectation values of the orbital-angular momentum on the product functions basis set is then given by:

$$\langle \Psi_n | \mathcal{L}_\gamma | \Psi_{n'} \rangle = \sum_{ij}^{N_{\text{TOT}}} \langle \phi_i | l_\gamma | \phi_j \rangle \text{cof}[\mathbf{S}](ij) \tag{S18}$$

It is easy to see that the  $z$  component of the total spin-angular momentum is given by:

$$\langle \Psi_n | \mathcal{S}_z | \Psi_{n'} \rangle = \frac{M_S}{2} \det(\mathbf{S}) \tag{S19}$$

where  $M_S = (N_\alpha^{\text{TOT}} - N_\beta^{\text{TOT}})$ . For the development of the equations for the  $x$  and  $y$  components it is more convenient to make use of the spin ladder operators:

$$s_x(i) = \frac{s_+(i) + s_-(i)}{2} \quad (\text{S20})$$

$$s_y(i) = i \frac{s_-(i) - s_+(i)}{2} \quad (\text{S21})$$

$s_+(i)$  operator flips the spin of the orbital  $\phi_i = \chi_i \eta_i$  in  $\Psi_{n'}$  from  $\beta$  to  $\alpha$ , or it destroys  $\Psi_{n'}$  if  $\eta_i = \alpha$ , or  $s_+(i) | \Psi_{n'} \rangle = 0$ . Similarly,  $s_-(i)$  flips  $\eta_i$  from  $\alpha$  to  $\beta$ .  $s_+(i)$  acting on a product function leads to:

$$\begin{aligned} \langle \Psi_n | s_+(i) | \Psi_{n'} \rangle &= \langle \Psi_n | \Psi_{n'} [\chi_i \beta \rightarrow \chi_i \alpha] \rangle \\ &= \det(\mathbf{S}') \end{aligned} \quad (\text{S22})$$

where  $\mathbf{S}' = \mathbf{S}[\chi_i \beta \rightarrow \chi_i \alpha]$ . Note that if  $\phi_i$  is an inactive orbital  $\det(\mathbf{S}') = 0$ , due to the presence of two identical columns. By the use of eq. (S20) and (S21),  $\mathcal{S}_x$  and  $\mathcal{S}_y$  on the product functions basis are given by:

$$\langle \Psi_n | \mathcal{S}_x | \Psi_{n'} \rangle = \frac{1}{2} \sum_i^{N_{\text{act}}} \langle \Psi_n | s_+(i) + s_-(i) | \Psi_{n'} \rangle \quad (\text{S23})$$

$$\langle \Psi_n | \mathcal{S}_y | \Psi_{n'} \rangle = \frac{i}{2} \sum_i^{N_{\text{act}}} \langle \Psi_n | s_-(i) - s_+(i) | \Psi_{n'} \rangle \quad (\text{S24})$$

Finally, the explicit form of the  $g$ -tensor for the system are calculated as the eigenvalues of the  $\mathbf{G}$  matrix, defined by:

$$G_{\gamma,\delta} = \sum_{ij} \langle \Phi_i | \mu_\gamma | \Phi_j \rangle \langle \Phi_j | \mu_\delta | \Phi_i \rangle \quad (\text{S25})$$

## Statistics

Table S1: Mean  $\mu$  and standard deviation  $\sigma$  for the % errors affecting the energies within the ground spin-orbit multiplet  ${}^7F_6$  of different Tb(III) complexes estimated using the different methods presented in this work versus the results calculated at CAHF/CASCI-SO level on the whole systems.

|                 | FAIMP1 |          | FAIMP2 |          | FAIMP3 |          | NOGF1 |          | NOGF2 |          | NOGF3 |          |
|-----------------|--------|----------|--------|----------|--------|----------|-------|----------|-------|----------|-------|----------|
|                 | $\mu$  | $\sigma$ | $\mu$  | $\sigma$ | $\mu$  | $\sigma$ | $\mu$ | $\sigma$ | $\mu$ | $\sigma$ | $\mu$ | $\sigma$ |
| acac3-2h2o      | -37.5  | 15.0     | -39.7  | 13.5     | -5.9   | 11.4     | -28.8 | 6.9      | -19.7 | 16.6     | +16.2 | 8.0      |
| acac3-dpq       | -70.1  | 5.2      | -49.8  | 6.7      | -30.6  | 7.9      | -35.6 | 8.5      | -11.7 | 6.6      | +3.5  | 6.3      |
| acac3-dppz      | -63.6  | 5.7      | -57.4  | 5.5      | -23.1  | 8.1      | -58.7 | 12.6     | -14.8 | 11.3     | +13.1 | 9.6      |
| acac3-phen      | -73.4  | 3.2      | -48.4  | 3.0      | -22.2  | 6.5      | -48.2 | 5.4      | -8.8  | 3.9      | +15.3 | 6.0      |
| pc2-            | -67.8  | 15.1     | -47.2  | 9.7      | -40.3  | 11.9     | -15.7 | 4.4      | -0.6  | 6.8      | +5.4  | 3.1      |
| paah2-2no3-meoh | -71.4  | 3.7      | -30.4  | 9.7      | +8.2   | 17.7     | -39.1 | 9.0      | +7.6  | 9.0      | +44.1 | 16.2     |
| tta3-bipy       | -79.6  | 5.8      | -66.0  | 2.9      | -38.7  | 7.0      | -76.3 | 9.8      | -16.9 | 5.2      | +11.3 | 8.3      |
| tta3-phen       | -74.4  | 4.5      | -54.4  | 3.9      | -34.8  | 6.5      | -49.6 | 7.9      | -11.8 | 4.2      | +7.3  | 5.4      |
| tfpb3-dppz      | -77.9  | 6.3      | -59.4  | 6.5      | -42.4  | 9.0      | -53.2 | 12.2     | -14.3 | 10.8     | +2.6  | 10.8     |
| hfac3-glyme     | -79.3  | 4.8      | -55.6  | 6.1      | -32.4  | 7.9      | -66.8 | 10.1     | -12.9 | 6.8      | +10.5 | 8.4      |

Table S2: Mean  $\mu$  and standard deviation  $\sigma$  for the % errors affecting the energies within the ground spin-orbit multiplet  ${}^6H_{15/2}$  of different Dy(III) complexes estimated using the different methods presented in this work versus the results calculated at CAHF/CASCI-SO level on the whole systems.

|                 | FAIMP1 |          | FAIMP2 |          | FAIMP3 |          | NOGF1 |          | NOGF2 |          | NOGF3 |          |
|-----------------|--------|----------|--------|----------|--------|----------|-------|----------|-------|----------|-------|----------|
|                 | $\mu$  | $\sigma$ | $\mu$  | $\sigma$ | $\mu$  | $\sigma$ | $\mu$ | $\sigma$ | $\mu$ | $\sigma$ | $\mu$ | $\sigma$ |
| acac3-2h2o      | -70.7  | 3.6      | -58.9  | 10.3     | -44.4  | 10.2     | -60.2 | 12.2     | -20.1 | 8.5      | -3.3  | 6.8      |
| acac3-dpq       | -68.8  | 5.1      | -54.2  | 3.5      | -39.0  | 5.2      | -45.6 | 7.9      | -20.9 | 6.5      | -4.2  | 7.5      |
| acac3-dppz      | -77.0  | 3.4      | -65.9  | 4.3      | -47.8  | 5.6      | -57.4 | 8.9      | -25.0 | 5.2      | -6.3  | 6.0      |
| acac3-phen      | -76.9  | 1.9      | -57.4  | 2.2      | -40.4  | 3.9      | -49.5 | 5.3      | -20.1 | 5.0      | -2.6  | 5.8      |
| pc2-            | +31.0  | 86.8     | -4.2   | 37.0     | +5.4   | 44.9     | -28.3 | 27.2     | -8.9  | 18.7     | -4.9  | 18.8     |
| trensai         | -68.1  | 19.1     | -63.2  | 5.0      | -40.8  | 11.2     | -10.9 | 13.5     | -14.3 | 11.7     | +2.2  | 15.7     |
| paah2-2no3-meoh | -79.7  | 5.8      | -48.6  | 1.2      | -24.6  | 2.3      | -53.5 | 4.2      | -6.6  | 4.5      | +17.4 | 5.8      |
| tta3-bipy       | -72.1  | 8.4      | -64.3  | 5.9      | -40.8  | 11.6     | -61.8 | 3.7      | -27.4 | 5.4      | -7.9  | 9.7      |
| tta3-phen       | -70.5  | 6.0      | -59.3  | 4.6      | -39.4  | 8.4      | -64.4 | 11.4     | -24.8 | 7.2      | -4.4  | 8.4      |
| tfpb3-dppz      | -74.5  | 7.8      | -66.0  | 4.5      | -49.0  | 7.5      | -62.7 | 7.1      | -30.6 | 6.3      | -14.5 | 6.5      |
| hfac3-glyme     | -70.8  | 3.6      | -59.2  | 2.9      | -40.5  | 6.1      | -56.9 | 4.8      | -26.1 | 6.9      | -8.4  | 8.3      |

Table S3: Mean  $\mu$  and standard deviation  $\sigma$  for the % errors affecting the energies within the ground spin-orbit multiplet  $^5I_8$  of different Ho(III) complexes estimated using the different methods presented in this work versus the results calculated at CAHF/CASCI-SO level on the whole systems.

|                 | FAIMP1 |          | FAIMP2 |          | FAIMP3 |          | NOGF1 |          | NOGF2 |          | NOGF3 |          |
|-----------------|--------|----------|--------|----------|--------|----------|-------|----------|-------|----------|-------|----------|
|                 | $\mu$  | $\sigma$ | $\mu$  | $\sigma$ | $\mu$  | $\sigma$ | $\mu$ | $\sigma$ | $\mu$ | $\sigma$ | $\mu$ | $\sigma$ |
| acac3-2h2o      | -66.2  | 10.8     | -71.4  | 7.6      | -66.0  | 11.3     | -43.3 | 14.6     | -23.2 | 2.9      | -17.6 | 8.5      |
| acac3-dpq       | -68.5  | 4.4      | -73.7  | 3.9      | -67.8  | 4.8      | -41.3 | 5.2      | -20.7 | 5.9      | -12.3 | 9.2      |
| acac3-dppz      | -74.8  | 4.7      | -76.7  | 2.3      | -68.2  | 2.5      | -51.5 | 5.1      | -27.1 | 4.2      | -18.3 | 6.4      |
| pc2-            | -11.8  | 37.9     | +1.2   | 48.0     | +3.2   | 49.6     | +29.7 | 102.9    | -30.5 | 16.1     | -26.4 | 15.6     |
| paah2-2no3-meoh | -77.1  | 3.1      | -71.9  | 3.9      | -60.0  | 5.8      | -53.7 | 3.1      | -20.4 | 7.7      | -8.6  | 12.5     |
| tta3-bipy       | -80.8  | 6.7      | -79.5  | 2.9      | -70.3  | 3.8      | -56.5 | 3.0      | -28.4 | 3.3      | -19.8 | 5.1      |
| tta3-phen       | -71.5  | 3.8      | -77.1  | 3.8      | -68.7  | 4.0      | -52.6 | 3.2      | -26.8 | 2.9      | -18.6 | 5.6      |
| tfpb3-dppz      | -69.0  | 5.6      | -78.5  | 5.0      | -49.5  | 3.1      | -49.5 | 3.1      | -14.5 | 19.0     | -25.4 | 5.3      |

Table S4: Mean  $\mu$  and standard deviation  $\sigma$  for the % errors affecting the energies within the ground spin-orbit multiplet  $^4I_{15/2}$  of different Er(III) complexes estimated using the different methods presented in this work versus the results calculated at CAHF/CASCI-SO level on the whole systems.

|                 | FAIMP1 |          | FAIMP2 |          | FAIMP3 |          | NOGF1 |          | NOGF2 |          | NOGF3 |          |
|-----------------|--------|----------|--------|----------|--------|----------|-------|----------|-------|----------|-------|----------|
|                 | $\mu$  | $\sigma$ | $\mu$  | $\sigma$ | $\mu$  | $\sigma$ | $\mu$ | $\sigma$ | $\mu$ | $\sigma$ | $\mu$ | $\sigma$ |
| acac3-2h2o      | -51.7  | 13.0     | -32.3  | 14.6     | -19.7  | 17.1     | -44.8 | 6.0      | -12.3 | 10.0     | -0.3  | 16.9     |
| acac3-dpq       | -53.1  | 14.5     | -46.6  | 18.4     | -42.4  | 14.4     | -27.6 | 18.6     | -7.9  | 24.1     | +1.0  | 30.4     |
| acac3-dppz      | -43.2  | 25.7     | -54.6  | 15.8     | -46.2  | 15.4     | -43.5 | 5.3      | -27.2 | 6.5      | -17.6 | 10.6     |
| acac3-phen      | -61.5  | 7.3      | -56.5  | 12.1     | -44.7  | 12.0     | -39.7 | 9.5      | -14.7 | 19.7     | +0.1  | 32.1     |
| trensal         | -54.9  | 23.7     | -62.4  | 14.2     | -43.9  | 22.4     | -38.1 | 18.0     | -21.7 | 21.8     | -21.8 | 21.7     |
| paah2-2no3-meoh | -80.8  | 4.9      | -77.4  | 3.0      | -67.5  | 4.2      | -52.0 | 2.2      | -32.0 | 3.3      | -26.4 | 5.2      |
| tta3-bipy       | -69.9  | 9.0      | -67.1  | 9.1      | -62.9  | 5.1      | -48.3 | 5.0      | -34.4 | 5.9      | -25.3 | 7.4      |
| tta3-phen       | -63.4  | 6.5      | -40.8  | 34.0     | -38.6  | 25.3     | -37.8 | 13.2     | -14.2 | 16.8     | -2.8  | 25.4     |
| tfpb3-dppz      | -59.1  | 10.3     | -35.1  | 49.1     | -37.8  | 39.8     | -36.3 | 18.2     | -18.9 | 13.5     | -25.6 | 8.4      |
| hfac3-glyme     | -67.2  | 8.9      | -35.5  | 40.9     | -28.5  | 39.3     | -44.5 | 7.1      | -19.1 | 15.5     | -6.7  | 22.6     |
